# Supplementary material
Source: Springer Nature journal article supplement (https://www.springermedizin.de/resource/supplementary/12885_2011_3020_MOESM7_ESM.pdf/9462640)

**A.**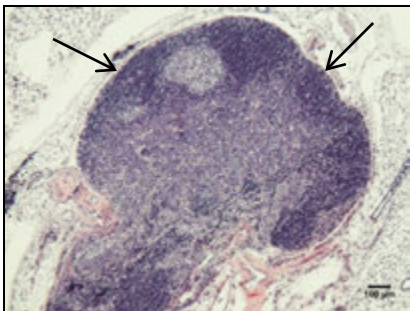**B.**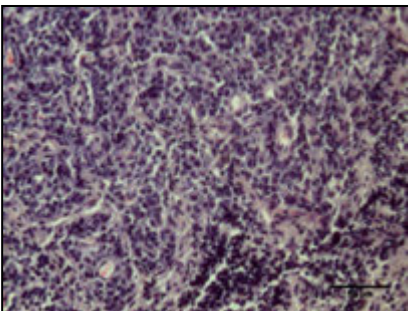**C.****Ki67**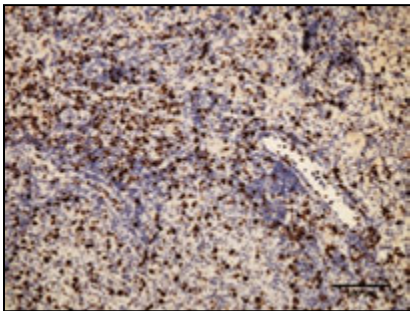**D.****TUNEL**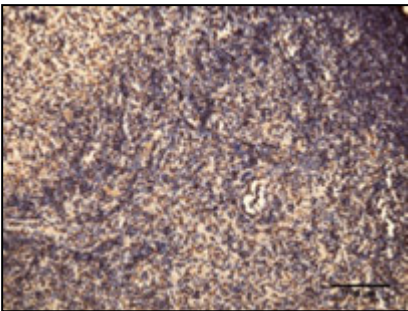**E.****Ki67 staining**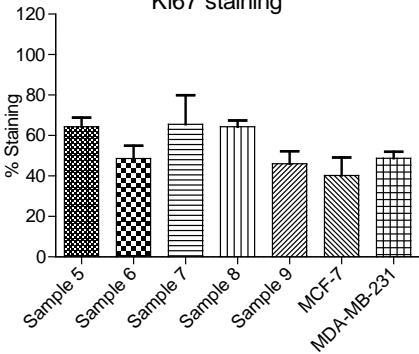**F.****TUNEL**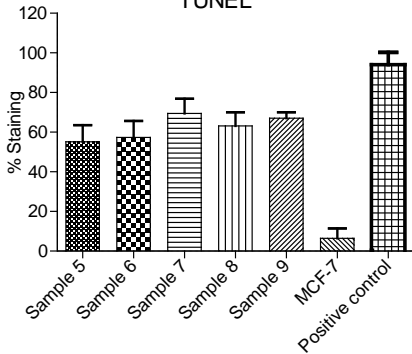

Supplement: MOESM7 [file 9462640]
